# Supplementary material for: The Timing of Water and Beverage Consumption During the Day Among Children and Adults in the United States: Analyses of NHANES 2011–2016 Data
Source: PubMed Central journal article supplement (PMC6893716; doi:10.3390/nu11112707), 2019-11-08
Supplement: nutrients-11-02707-s001.pdf [file nutrients-11-02707-s001.pdf]

**Table S1.** Water intakes (mL/d) from beverage categories (Mean, standard error).

|                                | Milk    | Milk substitutes | Citrus juices | Non citrus juices | Soda    | Diet soda | RTD tea | RTD coffee | Fruit drinks | Sport drinks | Energy drinks | Hot coffee/tea | Alcohol bev | Flavored water | Other bev | Suppl   |
|--------------------------------|---------|------------------|---------------|-------------------|---------|-----------|---------|------------|--------------|--------------|---------------|----------------|-------------|----------------|-----------|---------|
| All (22,716)                   | 79(2)   | 3(<1)            | 30(1)         | 25(1)             | 149(3)  | 77(3)     | 108 (3) | 12 (1)     | 54(2)        | 30(2)        | 8(1)          | 282 (5)        | 129 (4)     | 20 (1)         | 16(1)     | 12(1)   |
| <b>Sex</b>                     |         |                  |               |                   |         |           |         |            |              |              |               |                |             |                |           |         |
| Men (N = 11,206)               | 95(4)   | 3(0.4)           | 36(3)         | 26(1)             | 188(6)  | 79(5)     | 116(7)  | 10(2)      | 60(3)        | 46(4)        | 13(1)         | 297(11)        | 197(11)     | 19(2)          | 17(2)     | 14(2)   |
| Women (N = 11,510)             | 64(3)   | 3(0.3)           | 23(1)         | 25(1)             | 112(5)  | 75(5)     | 101(6)  | 13(1)      | 48(2)        | 15(2)        | 3(0.44)       | 268(9)         | 63(3)       | 22(2)          | 15(1)     | 10(1)   |
| test                           | <.0001  | 0.5473           | <.0001        | 0.2917            | <.0001  | 0.5305    | 0.0445  | 0.2128     | 0.0002       | <.0001       | <.0001        | 0.0011         | <.0001      | 0.095          | 0.39      | 0.0913  |
| <b>Age</b>                     |         |                  |               |                   |         |           |         |            |              |              |               |                |             |                |           |         |
| 4–8 y (N = 2644)               | 197(8)  | 4(1)             | 29(3)         | 64(4)             | 61(5)   | 4(1)      | 23(4)   | 0(0)       | 85(4)        | 19(3)        | 0(0)          | 4(1)           | 0(0)        | 8(2)           | 7(2)      | 3(1)    |
| 9–13 y (N = 2501)              | 150(7)  | 3(1)             | 30(3)         | 33(3)             | 126(6)  | 14(2)     | 48(5)   | 3(1)       | 87(5)        | 39(5)        | 0(0)          | 11(2)          | 0(0)        | 7(2)           | 14(2)     | 3(1)    |
| 14–18 y (N = 2308)             | 126(7)  | 2(1)             | 30(2)         | 33(3)             | 190(9)  | 21(6)     | 90(10)  | 9(2)       | 90(11)       | 52(10)       | 8(2)          | 39(6)          | 19(8)       | 17(6)          | 10(2)     | 7(2)    |
| 19–30 y (N = 3248)             | 57(5)   | 3(1)             | 34(3)         | 28(3)             | 220(8)  | 45(6)     | 96(7)   | 19(3)      | 68(5)        | 51(6)        | 19(3)         | 161(11)        | 172(13)     | 16(2)          | 15(2)     | 20(3)   |
| 31–50 y (N = 5071)             | 54(3)   | 3(0.4)           | 28(2)         | 18(1)             | 195(11) | 105(10)   | 123(9)  | 13(2)      | 46(3)        | 33(4)        | 11(2)         | 333(12)        | 195(12)     | 28(4)          | 17(2)     | 14(2)   |
| 51–70 y (N = 4873)             | 60(4)   | 3(0.5)           | 24(2)         | 19(2)             | 103(6)  | 126(9)    | 148(11) | 13(3)      | 33(3)        | 15(3)        | 4(1)          | 483(17)        | 152(11)     | 27(3)          | 18(3)     | 10(2)   |
| >70 y (N = 2071)               | 71(5)   | 3(1)             | 37(2)         | 19(2)             | 51(4)   | 62(5)     | 98(8)   | 7(1)       | 29(2)        | 7(2)         | 0(0)          | 412(14)        | 61(5)       | 9(2)           | 17(3)     | 12(1)   |
| test                           | <0.0001 | 0.4774           | 0.0011        | <0.0001           | <0.0001 | <0.0001   | <0.0001 | <0.0001    | <0.0001      | <0.0001      | <0.0001       | <0.0001        | <0.0001     | <0.0001        | 0.0005    | <0.0001 |
| <b>Time of Consumption (h)</b> |         |                  |               |                   |         |           |         |            |              |              |               |                |             |                |           |         |
| 06:00–09:00                    | 15(1)   | 1(0.1)           | 11(1)         | 4(0.3)            | 8(1)    | 7(1)      | 9(1)    | 4(1)       | 5(1)         | 3(1)         | 2(0.3)        | 135(5)         | 1(1)        | 2(0.4)         | 4(0.5)    | 4(0.4)  |
| 09:00–12:00                    | 15(1)   | 1(0.1)           | 8(0.5)        | 5(0.3)            | 21(1)   | 14(1)     | 19(2)   | 3(0.4)     | 8(0.5)       | 5(1)         | 2(0.3)        | 64(2)          | 6(2)        | 4(1)           | 3(0.2)    | 3(0.3)  |
| 12:00–15:00                    | 11(1)   | 0(0.1)           | 2(0.2)        | 4(0.3)            | 31(1)   | 18(1)     | 25(2)   | 1(0.1)     | 9(1)         | 6(1)         | 1(0.4)        | 15(1)          | 10(1)       | 4(0.6)         | 2(0.2)    | 1(0.3)  |
| 15:00–18:00                    | 5(0.4)  | 0(0)             | 2(0.2)        | 4(0.4)            | 27(1)   | 13(1)     | 16(1)   | 2(0.3)     | 10(1)        | 6(1)         | 1(0.2)        | 15(1)          | 20(1)       | 3(0.3)         | 2(0.2)    | 1(0.2)  |
| 18:00–21:00                    | 17(1)   | 1(0.1)           | 2(0.2)        | 5(0.3)            | 37(1)   | 15(1)     | 27(2)   | 1(0.2)     | 13(1)        | 5(1)         | 1(0.2)        | 15(1)          | 53(3)       | 4(1)           | 2(0.2)    | 1(0.2)  |
| 21:00–00:00                    | 10(1)   | 0(0)             | 2(0.2)        | 2(0.2)            | 16(1)   | 7(1)      | 8(1)    | 0(0)       | 5(0.3)       | 3(0.4)       | 0(0)          | 8(1)           | 27(2)       | 2(0.3)         | 1(0.1)    | 1(0.2)  |
| 00:00–06:00                    | 7(0.4)  | 0(0)             | 2(0.3)        | 2(0.2)            | 9(1)    | 3(0.4)    | 5(1)    | 1(0.2)     | 3(0.3)       | 1(0.2)       | 1(0.1)        | 30(2)          | 11(1)       | 1(0.3)         | 1(0.5)    | 1(0.3)  |
| test                           | <0.0001 | <0.0001          | <0.0001       | <0.0001           | <0.0001 | <0.0001   | <0.0001 | <0.0001    | <0.0001      | <0.0001      | <0.0001       | <0.0001        | <0.0001     | <0.0001        | <0.0001   | <0.0001 |
| <b>Type of Meal</b>            |         |                  |               |                   |         |           |         |            |              |              |               |                |             |                |           |         |
| Breakfast                      | 22(1)   | 1(0.1)           | 18(1)         | 6(0.3)            | 9(1)    | 6(1)      | 8(1)    | 5(0.4)     | 7(0.4)       | 2(0.3)       | 2(0.3)        | 149(4)         | 1(0.2)      | 1(0.2)         | 6(1)      | 5(0.5)  |
| AM Snack                       | 4(0.4)  | 0(0)             | 2(0.3)        | 3(0.3)            | 16(2)   | 13(1)     | 17(2)   | 3(1)       | 5(1)         | 6(1)         | 2(0.3)        | 76(5)          | 10(2)       | 5(1)           | 1(0.2)    | 1(0.2)  |
| Lunch                          | 16(1)   | 0(0)             | 3(0.3)        | 5(0.3)            | 42(2)   | 21(1)     | 29(2)   | 1(0.2)     | 12(1)        | 5(0.5)       | 1(0.3)        | 14(1)          | 5(1)        | 4(0.4)         | 3(0.3)    | 2(0.2)  |
| PM Snack                       | 5(1)    | 0(0)             | 2(0.2)        | 3(0.3)            | 23(1)   | 13(1)     | 17(1)   | 2(0.3)     | 9(1)         | 8(1)         | 2(0.4)        | 20(2)          | 32(3)       | 4(1)           | 1(0.2)    | 1(0.2)  |
| Dinner                         | 19(1)   | 1(0.1)           | 3(0.3)        | 5(0.4)            | 45(2)   | 17(1)     | 30(2)   | 1(0.2)     | 15(1)        | 4(1)         | 0(0)          | 12(1)          | 39(2)       | 3(0.4)         | 2(0.2)    | 1(0.2)  |
| Evening Snack                  | 13(1)   | 1(0.1)           | 2(0.2)        | 3(0.2)            | 15(1)   | 7(1)      | 8(1)    | 1(0.1)     | 6(0.3)       | 4(1)         | 1(0.2)        | 13(1)          | 42(3)       | 3(0.4)         | 2(0.2)    | 1(0.3)  |
| test                           | <0.0001 | <0.0001          | <0.0001       | <0.0001           | <0.0001 | <0.0001   | <0.0001 | <0.0001    | <0.0001      | <0.0001      | <0.0001       | <0.0001        | <0.0001     | <0.0001        | <0.0001   | <0.0001 |
